# Supplementary material for: The effect of dexamethasone on sexual function in a randomized trial in robotic hysterectomy
Source: Research Square preprint supplement (doi:10.21203/rs.3.rs-7510821/v1), 2025-09-30
Supplement: Supplementary file 1 [file 9892508520e417f72e2a2c77.doc]

**
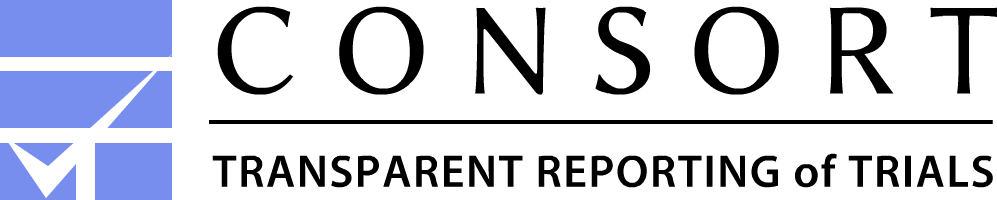
**

**CONSORT 2010 Flow Diagram**

**Allocation**

**Analysis**

**Follow-Up**

**Enrollment**

Assessed for eligibility (n= 128 )

Excluded (n= 16 )

  Not meeting inclusion criteria (n= 2 )

  Declined to participate (n=5 )

  Other reasons (n= 9 )

Analysed (n= 54 )
 Excluded from analysis (give reasons) (n=0 )

Lost to follow-up (give reasons) (n=0 )

Discontinued intervention (give reasons) (n=0 )

Allocated to intervention (n= 56)

 Received allocated intervention (n=54 )

 Did not receive allocated intervention (give reasons) (n= 2 )

Lost to follow-up (give reasons) (n= 0 )

Discontinued intervention (give reasons) (n=0 )

Allocated to placebo (n=58 )

 Received allocated intervention (n=58 )

 Did not receive allocated intervention (give reasons) (n=0 )

Analysed (n= 58 )
 Excluded from analysis (give reasons) (n=0 )

Randomized (n= 112 )

**The effect of dexamethasone on sexual function in a randomized trial in robotic hysterectomy**
